# Supplementary material for: New Zealand’s Integration-Based Policy for Driving Local Health System Improvement – Which Conditions Underpin More Successful Implementation?
Source: PubMed Central journal article supplement (PMC8064288; doi:10.5334/ijic.5602), 2021-04-23
Supplement: ijic-21-2-5602-s1.pdf [file ijic-21-2-5602-s1.pdf]

## Appendix 1

### Interview Schedule for District Participants

- 1) Please tell me about your current/past position(s) and your role/involvement in the implementation of the System Level Measures framework in your district
- 2) How have District Alliances between DHBs, PHOs and other organisations developed in your district over the past 5-8 years?
- 3) In your view, what is the System Level Measures framework meant to achieve, and how is it meant to achieve it?
- 4) Describe/comment on your experience in developing SLM Improvement Plans for your district in 2016 and 2017.
- 5) How does the SLM approach fit (or not fit) with existing approaches to measuring and monitoring performance in your district?
- 6) Comment on the capacity of organisations in the District Alliance to collaborate in the development of SLM Improvement Plans, and the implementation of those plans
- 7) Comment on the capacity in your district for organisations (individually and collectively) to gather and interpret relevant health outcome and health services data in order to:
  - Establish SLM benchmarks for the headline indicators
  - Choose contributory measures
  - Determine District Alliance funding priorities
  - Make decisions about services (further investment, disinvestment)
  - Attribute changes in SLM indicators to initiatives at the district level
- 8) What improvements/developments to the SLM framework would you like to see?
  - Probe what alternatives to the SLMs that interviewees might suggest? If so, how would these work for a District Alliance?
